# Supplementary material
Source: Research Square preprint supplement (doi:10.21203/rs.3.rs-8983646/v1)
Supplement: Supplementary file 1 [file 842cefeefd9efa78ceb4ded5.docx]

Table 2: Sample Characteristics of the study sample

| Characteristic | Category | Frequency  N (%) |
| --- | --- | --- |
| Age | 65-70  70-75  75-80  >80 | 80(34%)  74(31%)  54(23%)  29(12%) |
| Gender | Male | 126(54%) |
| Female | 107(46%) |
| Civil status | Single  Married | 10(4.3%)  223(95.7%) |
| Educational Level | Not attended to school  Primary  Secondary  University  Vocational | 25(10.7%)  87(37.3%)  115(49.4%)  5(2.1%)  1(0.4%) |
| Employed | Yes | 23(9.9%) |
