# Supplementary material
Source: Research Square preprint supplement (doi:10.21203/rs.3.rs-8983646/v1)
Supplement: Supplementary file 2 [file 93ad4590b06e1234e782d4c0.docx]

## Table 06. Distribution of participants based on medications and substances and their association with the prevalence of delirium.

| Variable name | Category | Delirium absent | Delirium present | P value  Chi-Square test/t-test |
| --- | --- | --- | --- | --- |
| Opioid pain relief medication | Yes | 17(8.9%) | 4(9.5%) | 0.777 |
| Sedative drugs | Yes | 9(4.7%) | 1(2.4%) | 0.454 |
| Alcohol use | Yes | 14(7.3%) | 3(7.1%) | 0.966 |
| Psychoactive substance use | Yes | 11(5.8%) | 1(2.4%) | 0.370 |
