# Supplementary material
Source: Research Square preprint supplement (doi:10.21203/rs.3.rs-8983646/v1)
Supplement: Supplementary file 3 [file c04884c3f9a18acdaff79ec5.docx]

Table 05. Laboratory Investigations and interventions and their association with the prevalence of delirium

| Variable name | Category | Delirium absent | Delirium present | P value  Chi-Square test/t-test |
| --- | --- | --- | --- | --- |
| Abnormal blood test | Yes | 73(38.2%) | 29(69%) | 0.001 |
| Assisted ventilation | Yes | 17(8.9%) | 15(35.7%) | 0.001 |
| Surgical intervention carried out | No | 170(89%) | 36(85.7%) | 0.546 |
| Type of Anaesthesia given | General | 11(55%) | 1(16.7%) | 0.213 |
| Local | 6(30%) | 4(66.7%) |
| Regional | 3(15%) | 1(16.7%) |
| bladder catheterization | Yes | 17(8.9%) | 25(59.5%) | 0.001 |
| ICU care | Yes | 3(1.6%) | 4(9.5%) | 0.006 |
| NG feeding | Yes | 2(1%) | 13(31%) | 0.001 |
