# Supplementary material
Source: Research Square preprint supplement (doi:10.21203/rs.3.rs-8983646/v1)
Supplement: Supplementary file 4 [file e037a54caad0f0204c2d03a5.docx]

| Domain | Candidate variables |
| --- | --- |
| 1. Social and demographic factors | Age, gender, civil status, educational level, employment status, and social support |
| 2. Physical illnesses | Dehydration, current infections, constipation  Stroke, comorbid medical illnesses, any functional decline, visual impairment, hearing impairment, sleep disturbances, stroke, pain-related conditions, and pressure ulcers |
| 3. Hospital-related factors | Duration of hospital stay |
| 4. Laboratory Investigations and  interventions | Abnormal blood test, assisted ventilation, surgical interventions, anaesthesia given, bladder catheterisation, Naso Gastric feeding and Intensive Care Unit care |
| 5. Medications and substances | Opioid pain relief, medication for dementia,  sedative drugs, alcohol use and psychoactive substances use |
| 6. Mental status and related factors | Past history of delirium, depression, psychiatric disorder, dementia and uninvestigated cognitive impairment |

Table 1: Clinically meaningful domains
