# Supplementary material
Source: Research Square preprint supplement (doi:10.21203/rs.3.rs-8983646/v1)
Supplement: Supplementary file 5 [file e26aea19ee2be7d5a9b1eb1b.docx]

Table 3. Sociodemographic Factors and Their Association with Delirium.

| Variable name | Category | Delirium absent | Delirium present | P value  Chi-Square test/t-test |
| --- | --- | --- | --- | --- |
| Age | Age | 73.06(SD=5.119) | 76.69(SD=6.639) | 0.001(t test) * |
| Gender | Male | 107(56%) | 19(45.2%) | 0.204 |
|  | Female | 84(44%) | 23(54.8%) |
| civil status | Single | 8(4.2%) | 2(4.8%) | 0.868 |
|  | Married | 183(95.8%) | 40(95.2%) |
| Educational level | Not attended to school | 20(10.5%) | 5(11.9%) | 0.962 |
|  | Primary | 70(36.5%) | 17(40.5%) |
|  | Secondary | 96(50.3%) | 19(45.2%) |
|  | University | 4(2.1%) | 1(2.4%) |
|  | Vocational | 1(0.5%) | 0(0%) |
| Employment status | NoUnenployed | 171(89.5%) | 39(92.6%) | 0.513 |
