# Supplementary material
Source: Research Square preprint supplement (doi:10.21203/rs.3.rs-8983646/v1)
Supplement: Supplementary file 6 [file e353d9fdc541f76ce79a2bea.docx]

| Variable name | Category | Delirium absent | Delirium present | P value  Chi-Square test/t-test |
| --- | --- | --- | --- | --- |
| Past history of delirium | Yes | 6(3.1%) | 16(38.1%) | 0.001 |
| History of diagnose depressive disorder | Yes | 0(0%) | 1(2.4%) | 0.033 |
| History of diagnosed psychiatric disorder | Yes | 4(2.1%) | 1(2.4%) | 0.908 |
| Cognitive related factors |  |  |  |  |
| History of uninvestigated memory impairment | Yes | 29(15.2%) | 7(16.7%) | 0.810 |

## Table No 07. Distribution of participants based on mental status and related factors, and their association with the prevalence of delirium
