# Supplementary material
Source: Research Square preprint supplement (doi:10.21203/rs.3.rs-8983646/v1)
Supplement: Supplementary file 7 [file e7d2d2e18841893ffb81ad7e.docx]

| Variable name | Category | Delirium absent | Delirium present | P value  Chi-Square test/t-test |
| --- | --- | --- | --- | --- |
| Dehydration | Yes | 6(3.1%) | 9(21.4%) | 0.001 |
| Current infection | Yes | 56(29.3%) | 34(81%) | 0.001 |
| History of Stroke | Yes | 27(14.1%) | 8(19%) | 0.420 |
| Constipation | Yes | 36(18.8%) | 8(19%) | 0.976 |
| Comorbid medical illnesses | Yes | 151(79.1%) | 39(92.9%) | 0.037 |
| Functional decline | Yes | 38(19.9%) | 21(50%) | 0.001 |
| Visual impairment | Yes | 101(52.9%) | 16(38.1%) | 0.083 |
| Hearing impairment | Yes | 48(25.1%) | 7(16.7%) | 0.242 |
| Sleep disturbances | Yes | 57(29.8%) | 25(59.5%) | 0.001 |
| Pain related conditions | Yes | 69(36.1%) | 20(47.6%) | 0.165 |
| nature of functional decline | Activities of daily living need support | 29(74.4%) | 19(90.5%) | 0.301 |
|  | Instrumental activities of daily living need support | 7(17.9%) | 1(4.8%) |
|  | Immobile or bed bound | 3(7.7%) | 1(4.8%) |

## Table No 4. Physical illnesses and their association with delirium
