# Supplementary material
Source: Research Square preprint supplement (doi:10.21203/rs.3.rs-8983646/v1)
Supplement: Supplementary file 8 [file f53c199cd53db4bf1015b035.docx]

| Significant Variable | P value | Odds Ratio | 95% Confidence  Interval | |
| --- | --- | --- | --- | --- |
| Age | 0.002 | 1.198 | 1.071 | 1.339 |
| Current infections | 0.001 | 10.204 | 2.840 | 37.037 |
| Bladder catheterization | 0.001 | 3.840 | 1.162 | 12.658 |
| NG feeding | 0.001 | 50.00 | 4.032 | 500.000 |
| Assisted ventilation | 0.001 | 6.750 | 1.700 | 27.020 |
| Past history of delirium | 0.001 | 9.433 | 2.347 | 38.461 |
| Duration of hospital stay | 0.046 | 1.102 | 1.003 | 1.210 |
| Sleep disturbance | 0.006 | 6.451 | 1.901 | 21.739 |

Table 08. Results of final model – factors predicting delirium.
